# Supplementary material for: Novel [2]pseudorotaxanes constructed by self-assembly of bis-urea-functionalized pillar[5]arene and linear alkyl dicarboxylates
Source: Royal Society of Chemistry journal article supplement (doi:10.1039/c2cc34049f), 2012-01-01
Supplement: c2cc34049f.pdf [file c2cc34049f.pdf]

## Electronic Supplementary Information

### Novel [2]pseudorotaxanes constructed by self-assembly of bis-urea-functionalized pillar[5]arene and linear alkyl dicarboxylates

Qunpeng Duan, Wei Xia, Xiaoyu Hu, Mengfei Ni, Juli Jiang, Chen Lin, Yi Pan and Leyong

Wang\*

*Key Laboratory of Mesoscopic Chemistry of MOE, Center for multimolecular Chemistry, School  
of Chemistry and Chemical Engineering, Nanjing University, Nanjing 210093 (China). Fax: +86*

*025 83597090; Tel: +86 025 83592529; E-mail: [lywang@nju.edu.cn](mailto:lywang@nju.edu.cn)*

|                                                                                                                                     |     |
|-------------------------------------------------------------------------------------------------------------------------------------|-----|
| 1. <i>Materials and methods</i>                                                                                                     | S1  |
| 2. <i>Synthesis of compound <b>H</b></i>                                                                                            | S2  |
| 3. <i>General procedure for the synthesis of bis-tetrabutylammonium (TBA) salts<br/>of linear alkyl dicarboxylates [<b>Gn</b>].</i> | S4  |
| 4. <i>2D NOESY analysis of <b>H</b> and <b>G13</b></i>                                                                              | S14 |
| 5. <i>Job plot for <b>G13</b> <math>\subset</math> <b>H</b></i>                                                                     | S15 |
| 6. <i>Schematic representation of external complicated complexes of <b>H</b> and <b>Gn</b></i>                                      | S15 |
| 7. <i><sup>1</sup>H NMR spectra of <b>H</b> in the absence and presence of <b>Gn</b></i>                                            | S16 |
| 8. <i>The result of ESI-MS analysis on <b>Gn</b> <math>\subset</math> <b>H</b> (Table S1)</i>                                       | S22 |
| 9. <i>Electrospray ionization mass spectra of <b>H</b> with <b>Gn</b> in DMSO-<i>d</i><sub>6</sub></i>                              | S23 |
| 10. <i>Determination of the association constants</i>                                                                               | S26 |
| <i>References</i>                                                                                                                   | S27 |

## 1. Materials and methods

All reagents were commercially available and used as supplied without further purification. Compound **1**<sup>S1</sup> and **G5**<sup>S2</sup> were prepared according to the published procedures. NMR spectra were recorded with a Bruker Advance DMX 300 spectrophotometer or a Bruker Advance DMX 400 spectrophotometer with use of the deuterated solvent as the lock and the residual solvent or TMS as the internal reference. Low-resolution electrospray ionization mass spectra (LR-ESI-MS) were obtained on Finnigan Mat TSQ 7000 instruments. High-resolution electrospray ionization mass spectra (HR-ESI-MS) were recorded on an Agilent 6210 TOF LCMS equipped with an electrospray ionization (ESI) probe operating in positive-ion mode with direct infusion.

## 2. Synthesis of compound **H**.

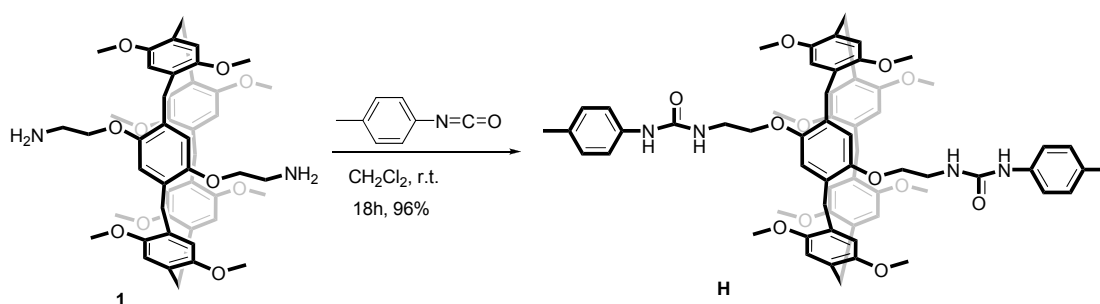

**Scheme S1.** Synthesis of bis-urea-functionalized pillar[5]arene host (**H**).

To a solution of compound **1** (0.95 g, 1.17 mmol) in dry  $\text{CH}_2\text{Cl}_2$  (150 mL) was added *p*-tolyl isocyanate (0.47 g, 3.51 mmol) under an argon-gas atmosphere. After stirring at room temperature for 18 h, the solvent was removed and the residue was purified by silica gel chromatography ( $\text{CH}_2\text{Cl}_2/\text{MeOH}$ , 200:1) to afford compound **H** as a white solid (1.21 g, 96 %). mp 136-138 °C. The  $^1\text{H}$  NMR spectrum of **H** is shown in Figure S1.  $^1\text{H}$  NMR (300 MHz,  $\text{DMSO}-d_6$ )  $\delta$  (ppm): 8.45 (s, 2H), 7.28 (d,  $J = 8.1$  Hz, 4H), 7.03 (d,  $J = 8.2$  Hz, 4H), 6.86 (s, 2H), 6.76-6.81 (m, 8H), 6.37 (t,  $J = 5.2$  Hz, 2H), 3.64-3.95 (m, 38H), 3.49-3.52 (m, 4H), 2.21 (s, 6H). The  $^{13}\text{C}$  NMR spectrum of **H** is shown in Figure S2.  $^{13}\text{C}$  NMR (75 MHz,  $\text{DMSO}-d_6$ )  $\delta$  (ppm): 155.4, 150.0, 149.9, 149.8, 149.2, 137.9, 129.8, 129.1, 127.9, 127.6, 127.5, 127.5, 117.7, 114.4, 113.6, 113.3, 67.7, 55.5, 55.4, 29.0, 28.8, 20.3. LRESIMS ( $m/z$ ): 1075.45  $[\text{M} + \text{H}]^+$ , 1097.45  $[\text{M} + \text{Na}]^+$ . HRESIMS ( $m/z$ ): calcd for  $[\text{M} + \text{Na}]^+$   $\text{C}_{63}\text{H}_{70}\text{N}_4\text{O}_{12}\text{Na}$ , 1097.4888; found 1097.4904.

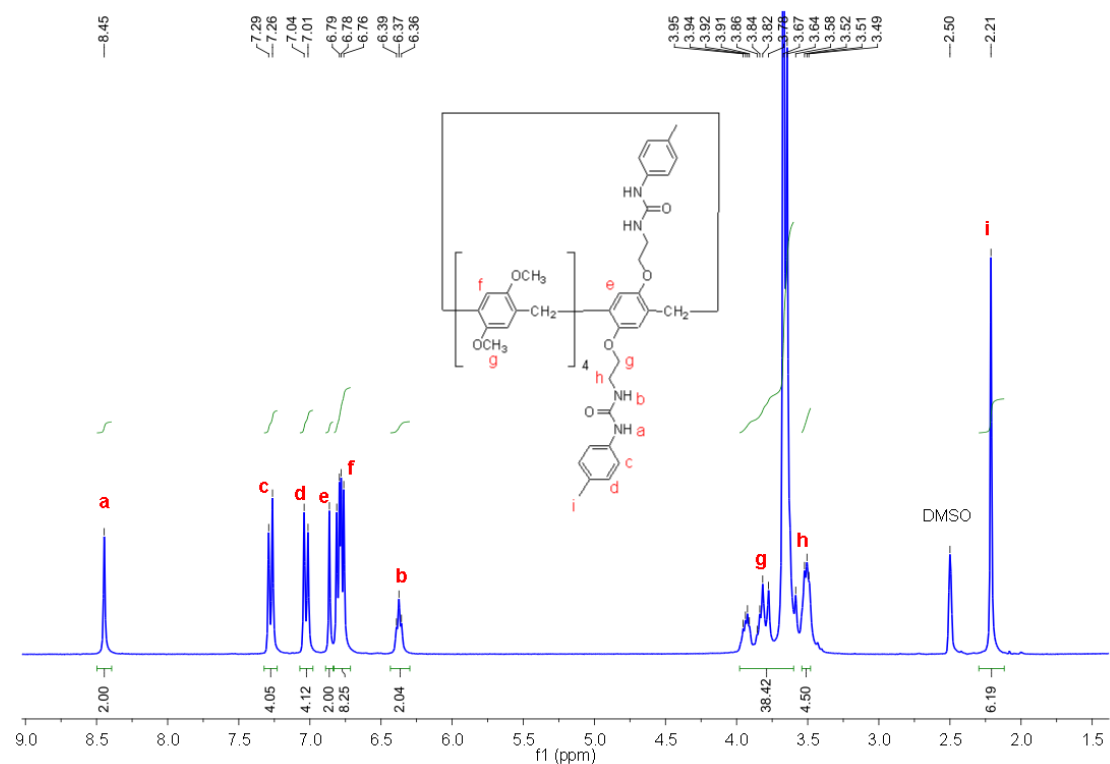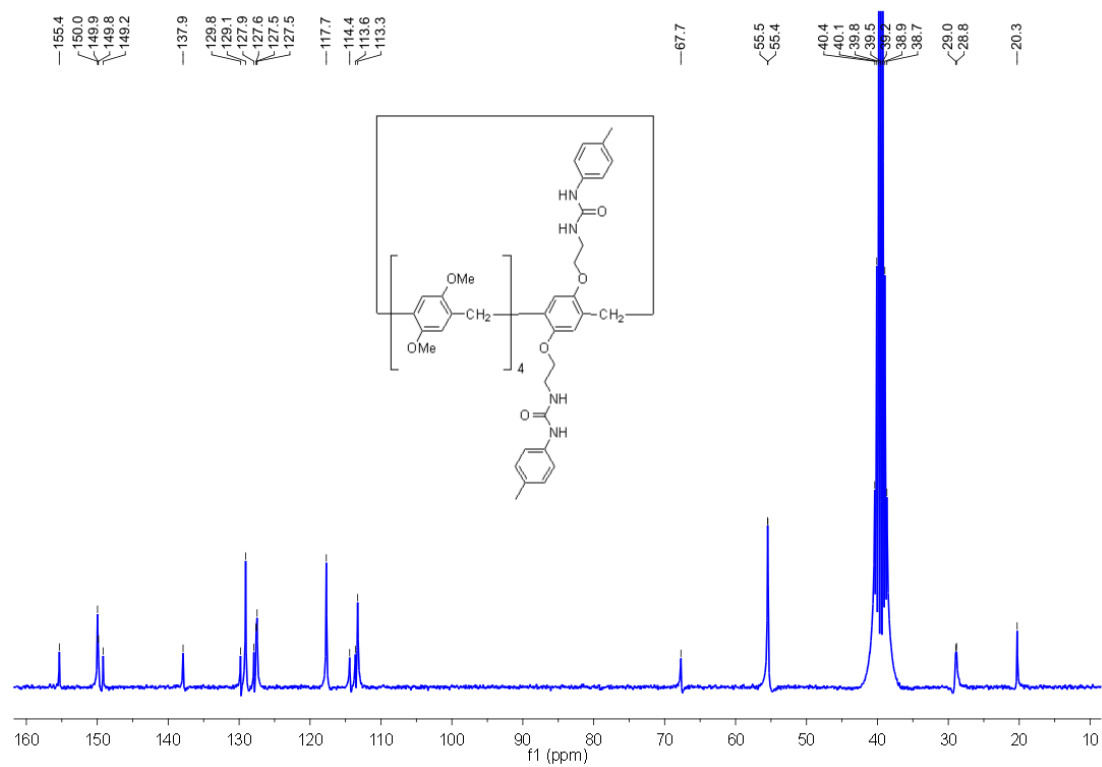

3. General procedure for the synthesis of bis-tetrabutylammonium (TBA) salts of linear alkyl dicarboxylates [**Gn**].

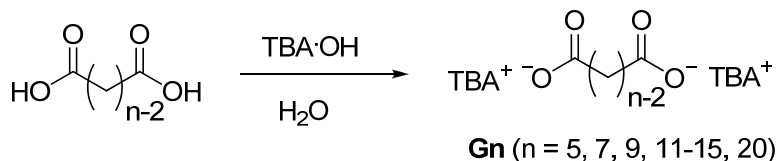

In a typical synthesis tetrabutylammonium hydroxide (10% in water) was added dropwise to a stirred solution of the appropriate diacid (2.0 mmol) in water (10 mL) until the pH = 8. Removal of the solvent by evaporation, compound **Gn** was obtained as a clear paste in good yields (94-99%).

**G7 (n = 7):**

The  $^1\text{H}$  NMR spectrum of **G7** is shown in Figure S3.  $^1\text{H}$  NMR (400 MHz,  $\text{DMSO-}d_6$ )  $\delta$  (ppm): 3.15-3.19 (m, 16H), 1.66-1.70 (m, 4H), 1.53-1.61 (m, 16H), 1.26-1.35 (m, 20H), 1.03-1.10 (m, 2H), 0.93 (t,  $J = 7.3$  Hz, 24H). The  $^{13}\text{C}$  NMR spectrum of **G7** is shown in Figure S4.  $^{13}\text{C}$  NMR (100 MHz,  $\text{DMSO-}d_6$ )  $\delta$  (ppm): 174.8, 57.5, 39.8, 30.6, 27.3, 23.1, 19.2, 13.5. LRESIMS (m/z): 400.20  $[\text{M} - \text{TBA}]^-$ , 159.00  $[\text{M} + \text{H} - 2\text{TBA}]^-$ .

**G9 (n = 9):**

The  $^1\text{H}$  NMR spectrum of **G9** is shown in Figure S5.  $^1\text{H}$  NMR (400 MHz,  $\text{DMSO-}d_6$ )  $\delta$  (ppm): 3.15-3.20 (m, 16H), 1.70-1.74 (m, 4H), 1.53-1.61 (m, 16H), 1.27-1.37 (m, 20H), 1.11-1.16 (m, 6H), 0.94 (t,  $J = 7.3$  Hz, 24H). The  $^{13}\text{C}$  NMR spectrum of **G9** is shown in Figure S6.  $^{13}\text{C}$  NMR (100 MHz,  $\text{DMSO-}d_6$ )  $\delta$  (ppm): 174.7, 57.5, 29.9, 29.6, 27.0, 23.1, 19.2, 13.5. LRESIMS (m/z): 428.25  $[\text{M} - \text{TBA}]^-$ , 187.00  $[\text{M} + \text{H} - 2\text{TBA}]^-$ .

**G11 (n = 11):**

The  $^1\text{H}$  NMR spectrum of **G11** is shown in Figure S7.  $^1\text{H}$  NMR (400 MHz,  $\text{DMSO-}d_6$ )  $\delta$  (ppm): 3.16-3.20 (m, 16H), 1.71-1.75 (m, 4H), 1.53-1.61 (m, 16H), 1.27-1.36 (m, 20H), 1.14-1.19 (m, 10H), 0.94 (t,  $J = 7.3$  Hz, 24H). The  $^{13}\text{C}$  NMR spectrum of **G11** is shown in Figure S8.  $^{13}\text{C}$  NMR (100 MHz,  $\text{DMSO-}d_6$ )  $\delta$  (ppm): 174.8, 57.5, 39.4, 29.8, 29.4, 26.9, 23.1, 19.2, 13.5. LRESIMS (m/z): 456.25  $[\text{M} - \text{TBA}]^-$ , 215.05  $[\text{M} + \text{H} - 2\text{TBA}]^-$ .

**G12 (n = 12):**

The  $^1\text{H}$  NMR spectrum of **G12** is shown in Figure S9.  $^1\text{H}$  NMR (300 MHz,  $\text{DMSO-}d_6$ )  $\delta$  (ppm): 3.15-3.20 (m, 16H), 1.71 (t,  $J = 7.4$  Hz, 4H), 1.52-1.62 (m, 16H), 1.24-1.36 (m, 20H), 1.11-1.19 (m, 12H), 0.93 (t,  $J = 7.3$  Hz, 24H). The  $^{13}\text{C}$  NMR spectrum of **G12** is shown in Figure S10.  $^{13}\text{C}$  NMR (100 MHz,  $\text{DMSO-}d_6$ )  $\delta$  (ppm): 174.6, 57.5, 39.4, 29.8, 29.4, 29.3, 26.9, 23.1, 19.2, 13.5. LRESIMS (m/z): 470.30  $[\text{M} - \text{TBA}]^-$ , 229.05  $[\text{M} + \text{H} - 2\text{TBA}]^-$ .

**G13 (n = 13):**

The  $^1\text{H}$  NMR spectrum of **G13** is shown in Figure S11.  $^1\text{H}$  NMR (300 MHz,  $\text{DMSO-}d_6$ )  $\delta$  (ppm): 3.17-3.22 (m, 16H), 1.77 (t,  $J = 7.4$  Hz, 4H), 1.53-1.63 (m, 16H), 1.21-1.41 (m, 34H), 0.93 (t,  $J = 7.3$  Hz, 24H). The  $^{13}\text{C}$  NMR spectrum of **G13** is shown in Figure S12.  $^{13}\text{C}$  NMR (75 MHz,  $\text{DMSO-}d_6$ )  $\delta$  (ppm): 174.9, 57.5, 38.9, 29.60, 29.3, 29.2, 26.7, 23.1, 19.2, 13.5. LRESIMS (m/z): 484.40  $[\text{M} - \text{TBA}]^-$ , 243.10  $[\text{M} + \text{H} - 2\text{TBA}]^-$ .

**G14 (n = 14):**

The  $^1\text{H}$  NMR spectrum of **G14** is shown in Figure S13.  $^1\text{H}$  NMR (400 MHz,  $\text{DMSO-}d_6$ )  $\delta$  (ppm): 3.16-3.20 (m, 16H), 1.74 (t,  $J = 7.4$  Hz, 4H), 1.53-1.61 (m, 16H), 1.27-1.39 (m, 20H), 1.19-1.22 (m, 16H), 0.94 (t,  $J = 7.3$  Hz, 24H). The  $^{13}\text{C}$  NMR spectrum of **G14** is shown in Figure S14.  $^{13}\text{C}$  NMR (100 MHz,  $\text{DMSO-}d_6$ )  $\delta$  (ppm): 174.8, 57.5, 29.6, 29.3, 29.2, 29.2, 26.8, 23.1, 19.2, 13.5. LRESIMS (m/z): 498.30  $[\text{M} - \text{TBA}]^-$ , 257.05  $[\text{M} + \text{H} - 2\text{TBA}]^-$ .

**G15 (n = 15):**

The  $^1\text{H}$  NMR spectrum of **G15** is shown in Figure S15.  $^1\text{H}$  NMR (400 MHz,  $\text{DMSO-}d_6$ )  $\delta$  (ppm): 3.16-3.20 (m, 16H), 1.73 (t,  $J = 7.4$  Hz, 4H), 1.53-1.61 (m, 16H), 1.26-1.38 (m, 20H), 1.14-1.22 (m, 18H), 0.94 (t,  $J = 7.3$  Hz, 24H). The  $^{13}\text{C}$  NMR spectrum of **G15** is shown in Figure S16.  $^{13}\text{C}$  NMR (100 MHz,  $\text{DMSO-}d_6$ )  $\delta$  (ppm): 174.7, 57.5, 39.2, 29.7, 29.3, 29.2, 29.2, 26.8, 23.1, 19.2, 13.5. LRESIMS (m/z): 512.30  $[\text{M} - \text{TBA}]^-$ , 271.05  $[\text{M} + \text{H} - 2\text{TBA}]^-$ .

**G20 (n = 20):**

The  $^1\text{H}$  NMR spectrum of **G20** is shown in Figure S17.  $^1\text{H}$  NMR (400 MHz,  $\text{DMSO-}d_6$ )  $\delta$  (ppm): 3.15-3.19 (m, 16H), 1.75 (t,  $J = 7.4$  Hz, 4H), 1.55 (m, 16H), 1.31 (m, 48H), 0.94 (t,  $J = 7.3$  Hz, 24H). The  $^{13}\text{C}$  NMR spectrum of **G20** is shown in Figure S18.  $^{13}\text{C}$  NMR (100 MHz,  $\text{DMSO-}d_6$ )  $\delta$  (ppm): 175.2, 57.6, 39.2, 29.7, 29.3, 29.2, 29.2, 29.1, 29.1, 26.8, 23.1, 19.2, 13.5. LRESIMS (m/z): 582.35  $[\text{M} - \text{TBA}]^-$ , 341.15  $[\text{M} + \text{H} - 2\text{TBA}]^-$ .

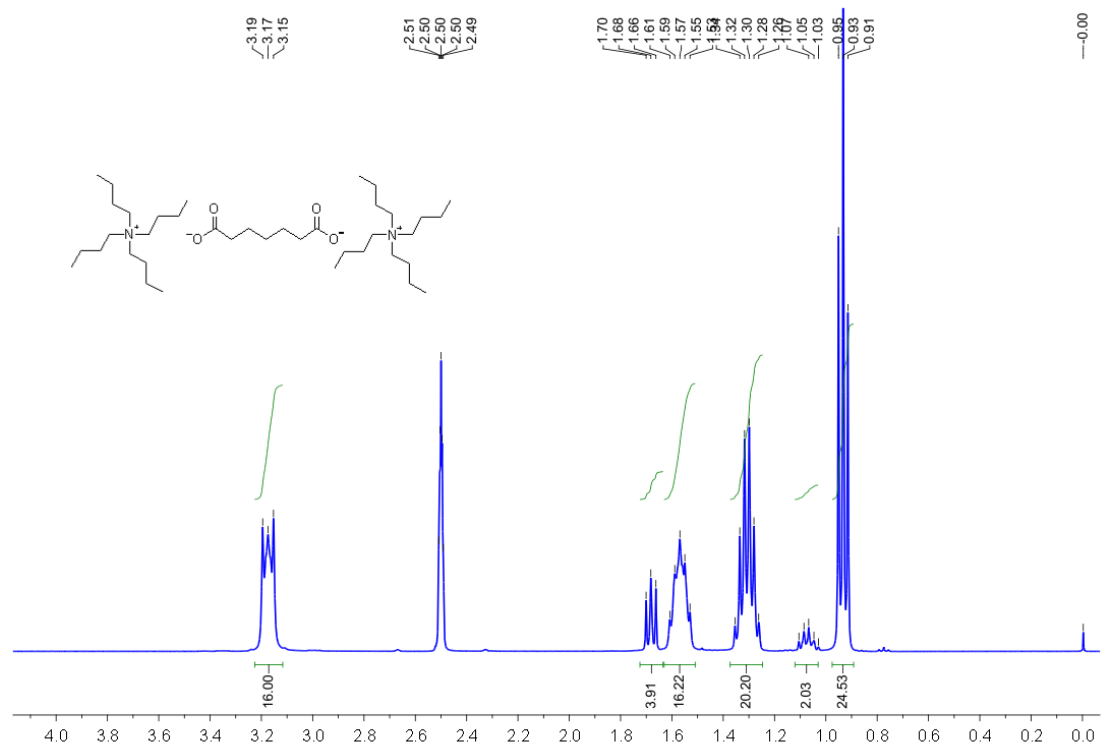

**Figure S3.** <sup>1</sup>H NMR spectrum (400 MHz) of **G7** in DMSO-*d*<sub>6</sub>.

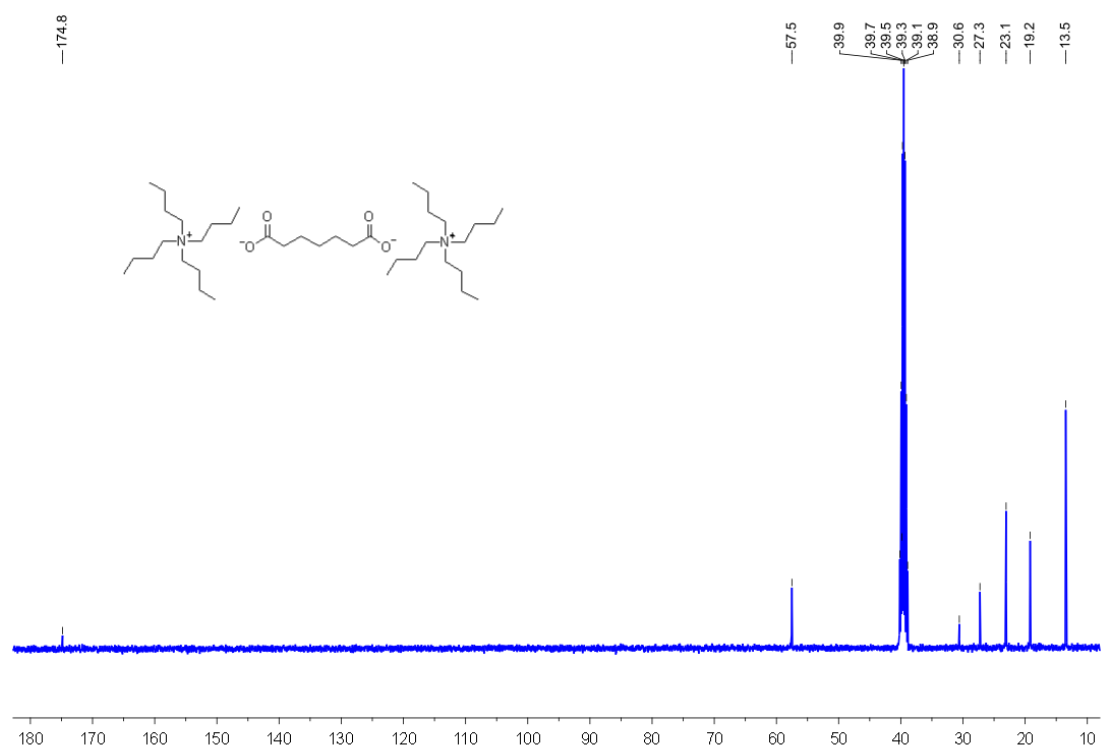

**Figure S4.** <sup>13</sup>C NMR spectrum (100 MHz) of **G7** in DMSO-*d*<sub>6</sub>.

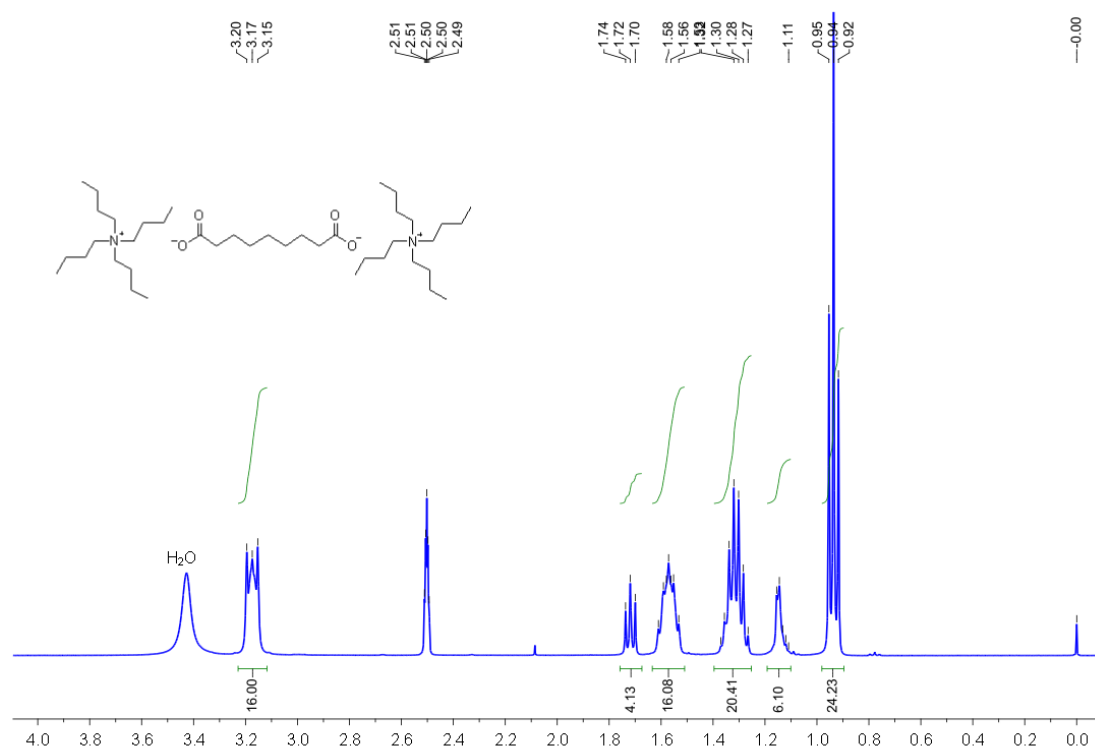

**Figure S5.** <sup>1</sup>H NMR spectrum (400 MHz) of G9 in DMSO-*d*<sub>6</sub>.

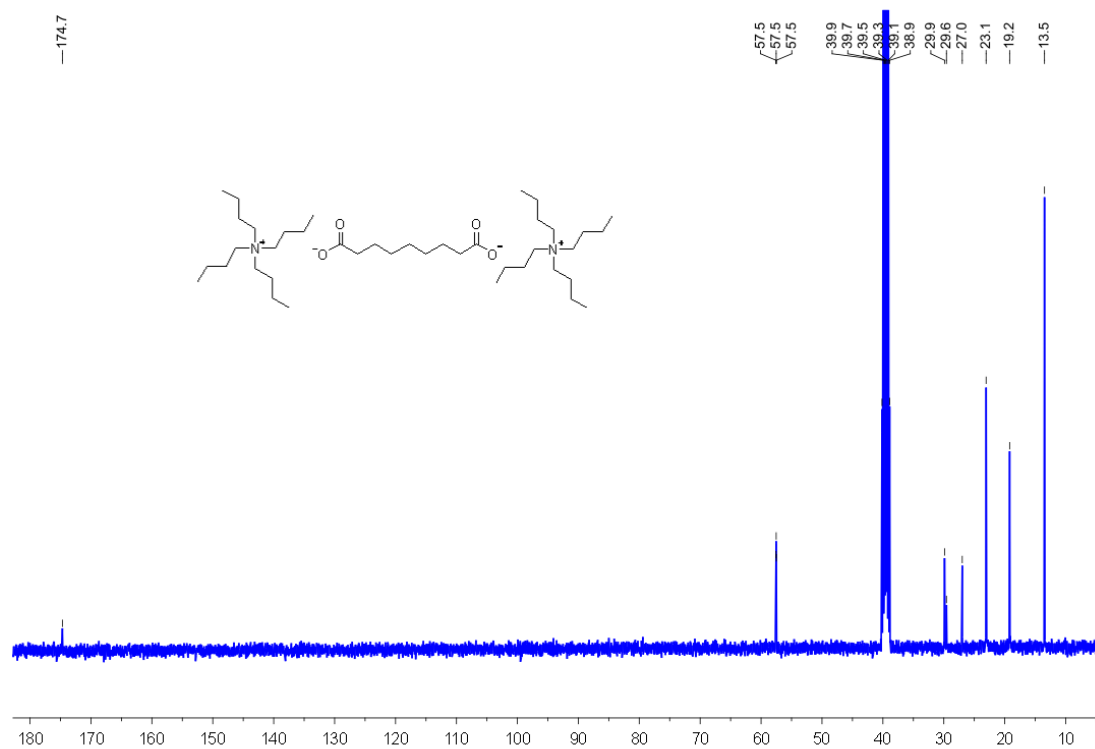

**Figure S6.** <sup>13</sup>C NMR spectrum (100 MHz) of G9 in DMSO-*d*<sub>6</sub>.

**Figure S7.**  $^1\text{H}$  NMR spectrum (400 MHz) of **G11** in  $\text{DMSO-}d_6$ .

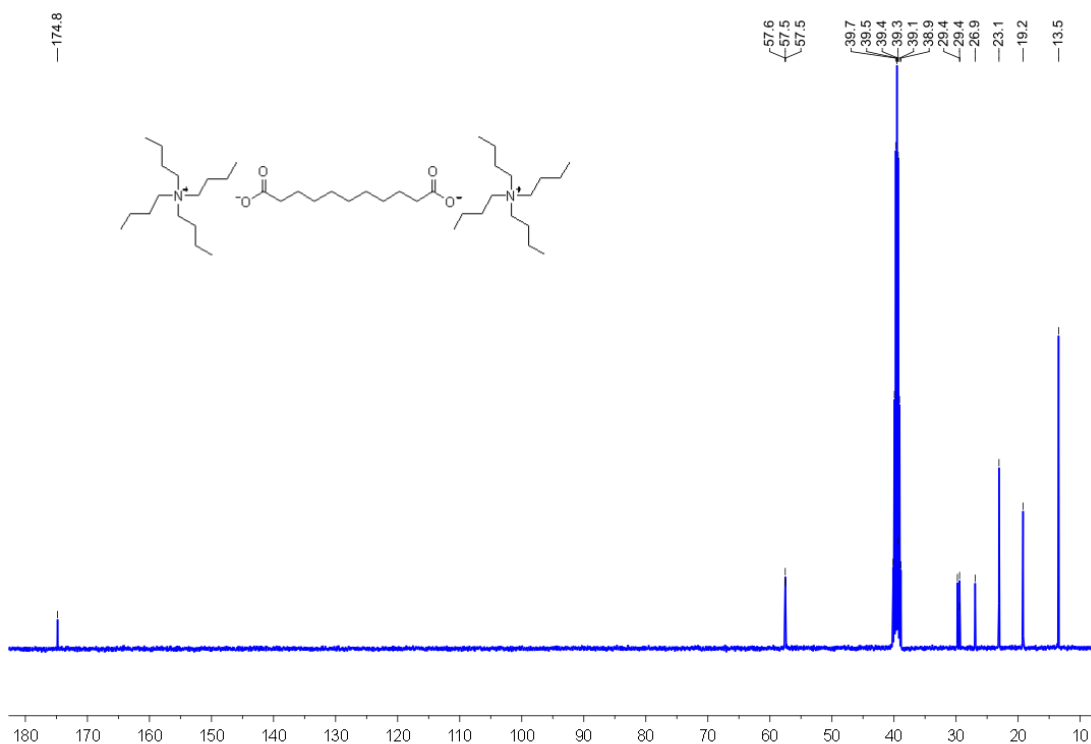

**Figure S8.**  $^{13}\text{C}$  NMR spectrum (100 MHz) of **G11** in DMSO- $d_6$ .



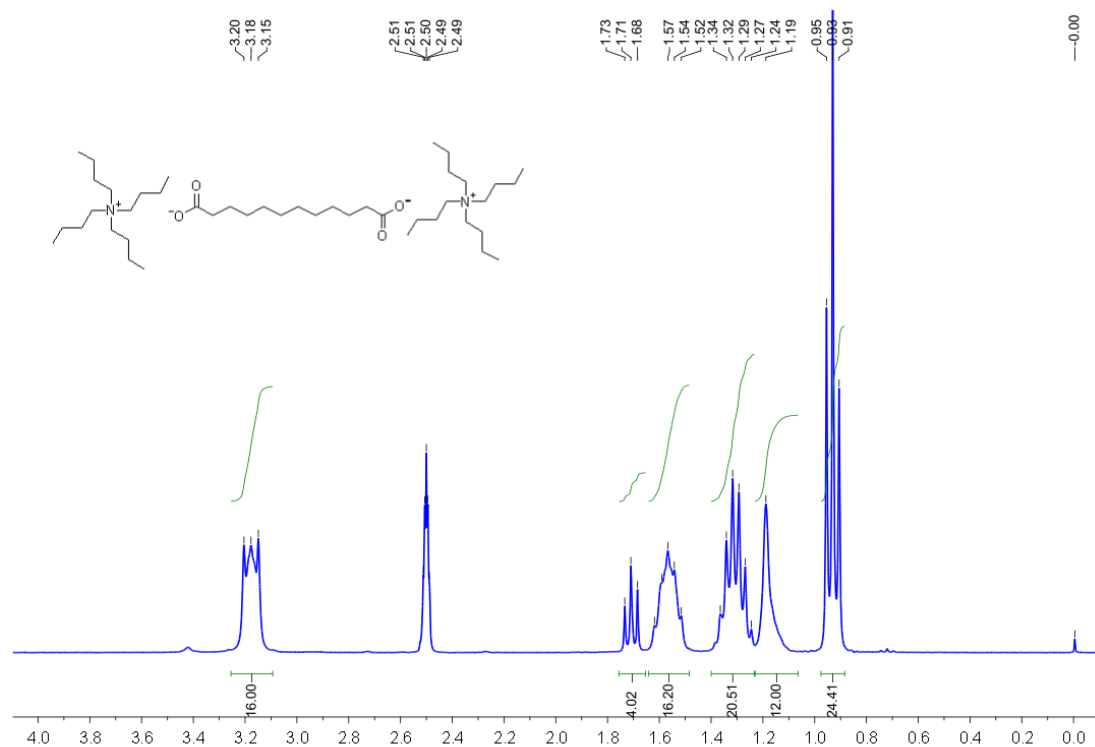

**Figure S9.** <sup>1</sup>H NMR spectrum (300 MHz) of **G12** in DMSO-*d*<sub>6</sub>.

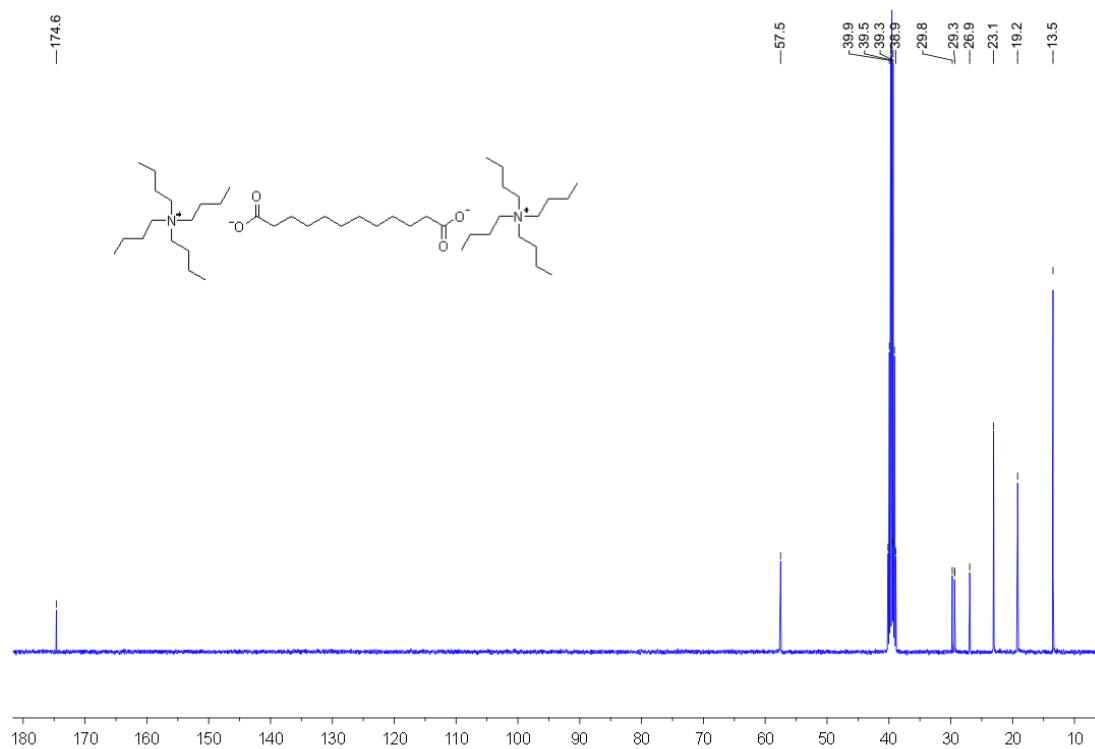

**Figure S10.** <sup>13</sup>C NMR spectrum (100 MHz) of **G12** in DMSO-*d*<sub>6</sub>.

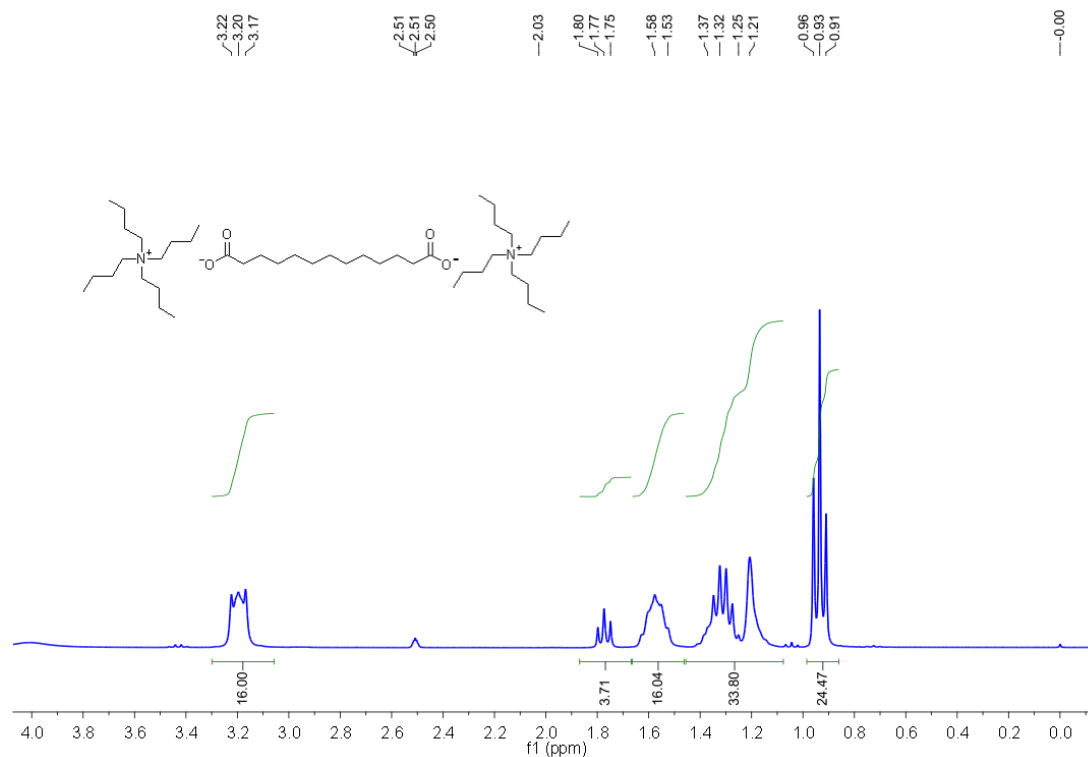

**Figure S11.** <sup>1</sup>H NMR spectrum (300 MHz) of G13 in DMSO-*d*<sub>6</sub>.

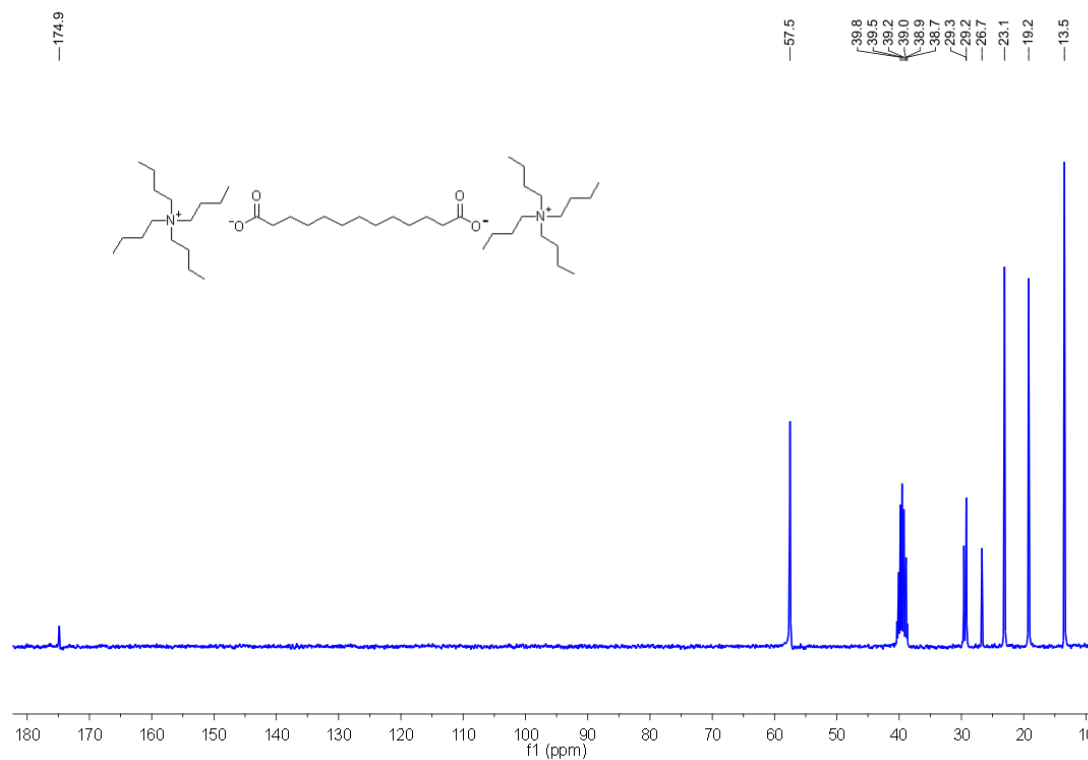

**Figure S12.** <sup>13</sup>C NMR spectrum (75 MHz) of G13 in DMSO-*d*<sub>6</sub>.

**Figure S13.**  $^1\text{H}$  NMR spectrum (400 MHz) of **G14** in  $\text{DMSO}-d_6$ .

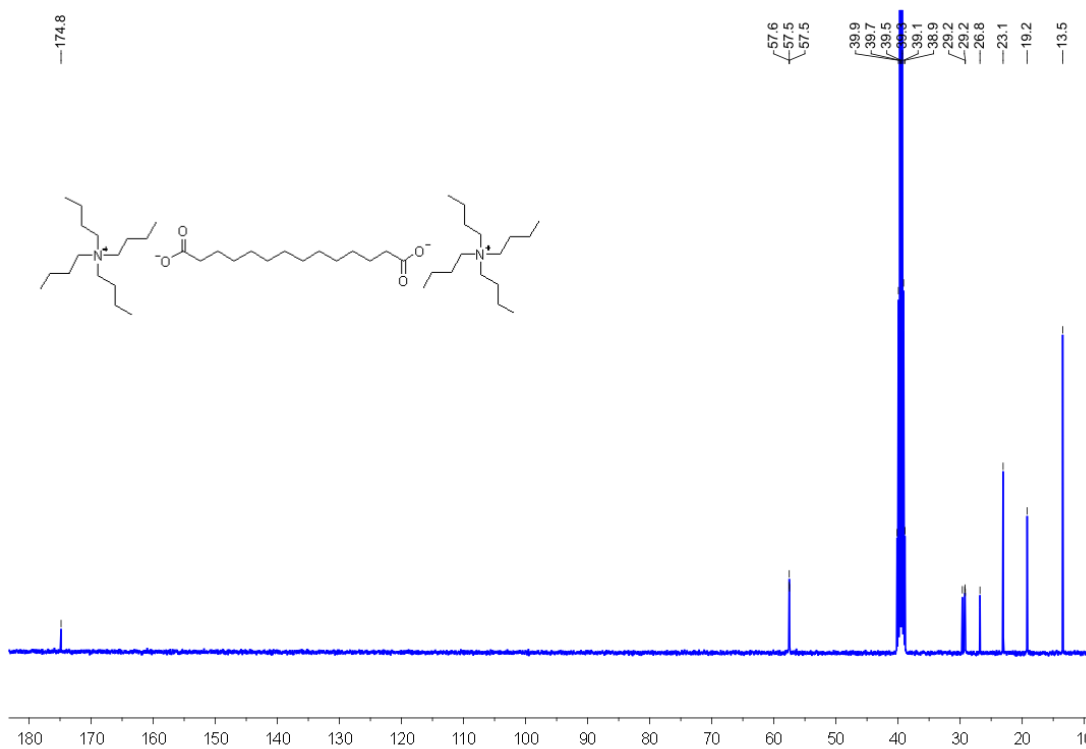

**Figure S14.**  $^{13}\text{C}$  NMR spectrum (100 MHz) of **G14** in  $\text{DMSO-}d_6$ .

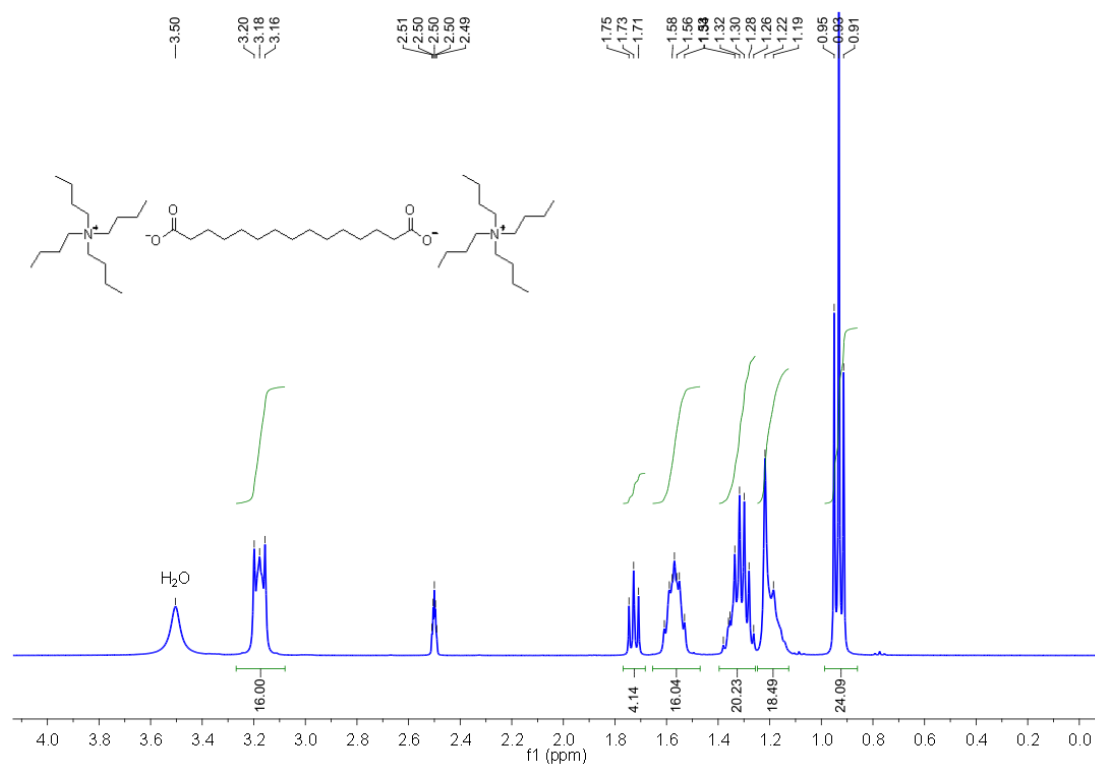

**Figure S15.** <sup>1</sup>H NMR spectrum (400 MHz) of G15 in DMSO-*d*<sub>6</sub>.

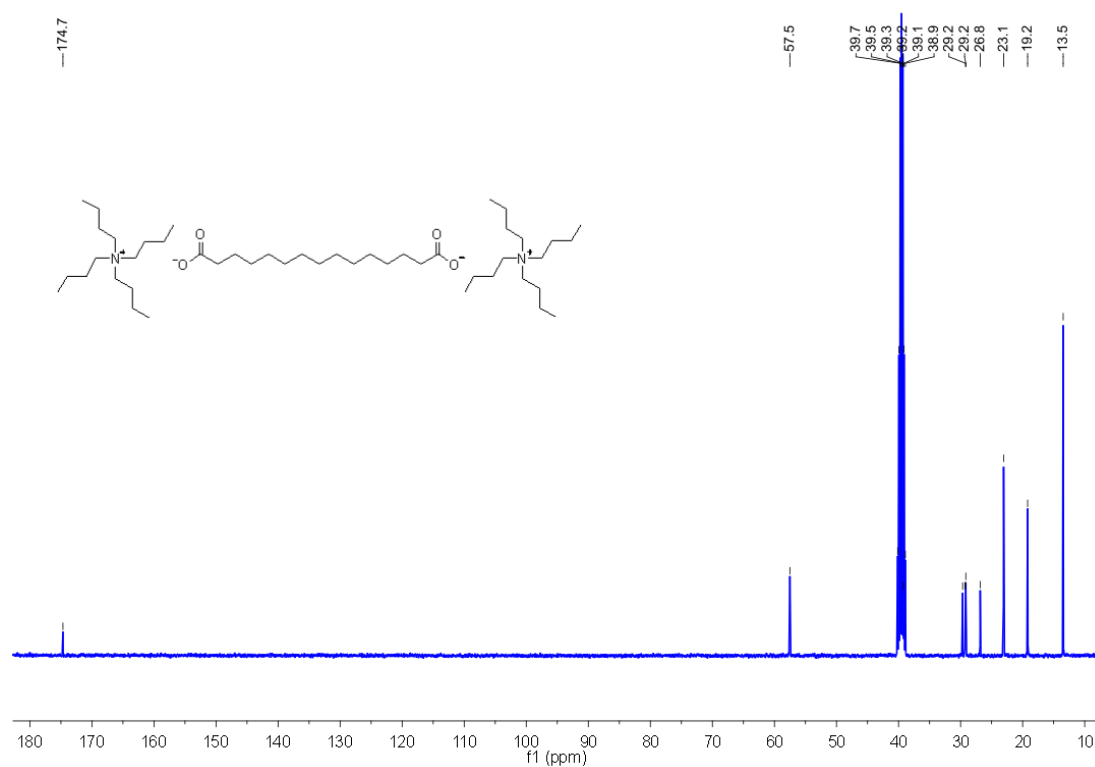

**Figure S16.** <sup>13</sup>C NMR spectrum (100 MHz) of G15 in DMSO-*d*<sub>6</sub>.



4. 2D NOESY analysis of **G13** with **H**.

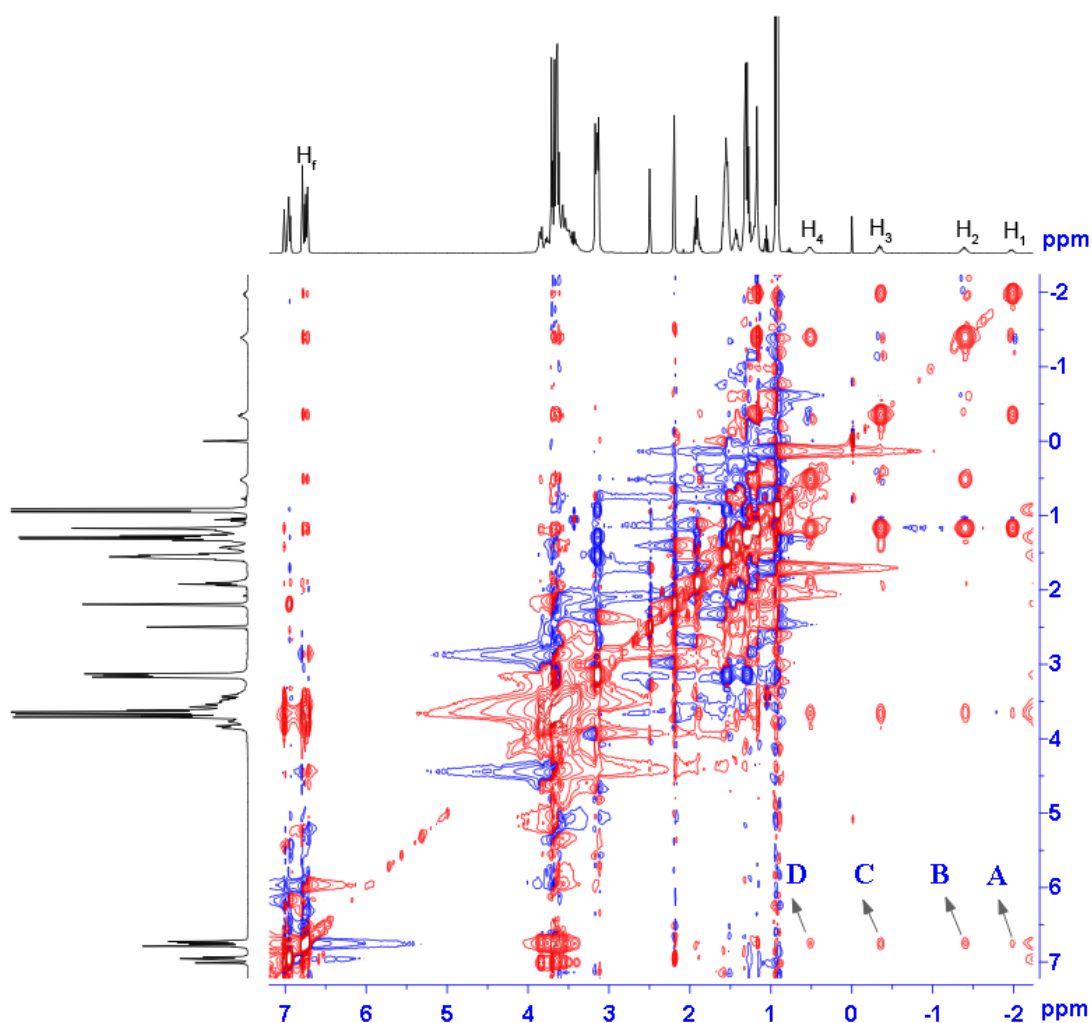

**Figure S19.** 2D NOESY analysis of **G13** (30 mM) with **H** (20 mM) in DMSO- $d_6$  (400 MHz, 298 K) with a mixing time of 300 ms. NOE correlations (marked with A,B,C and D) were observed between methylene protons of **G13** and aromatic protons of **H**, indicating that **G13** threaded within the cavity of **H**.

### 5. Job plot for $G13 \subset H$

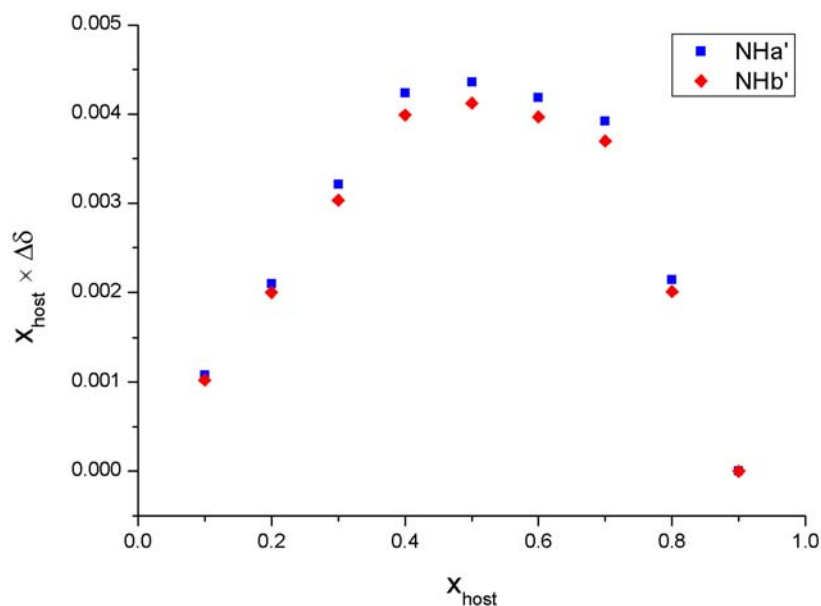

**Figure S20.** Job plot between bis-urea-functionalized pillar[5]arene **H** (host) and bis-TBA salt of tridecanedioate **G13** collected by plotting the  $\Delta\delta$  in chemical shift of the urea protons  $H_{a'}$  and  $H_{b'}$  from interpenetrated **H** observed by  $^1\text{H}$  NMR spectroscopy ( $\text{DMSO-}d_6$ ) against the change in the mole fraction of the host ( $X_{\text{host}}$ ). The plot indicates a 1:1 binding ratio between the host and guest.

### 6. Schematic representation of external complicated complexes of **H** and **Gn**

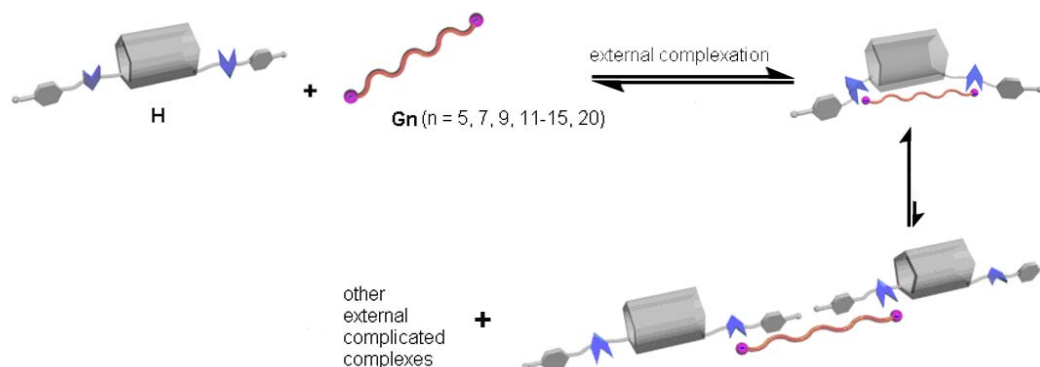

**Scheme S2.** Schematic illustration of the formation of external complicated complexes from **H** and **Gn**.

7.  $^1\text{H}$  NMR spectra of **H** in the absence and presence of **Gn**.

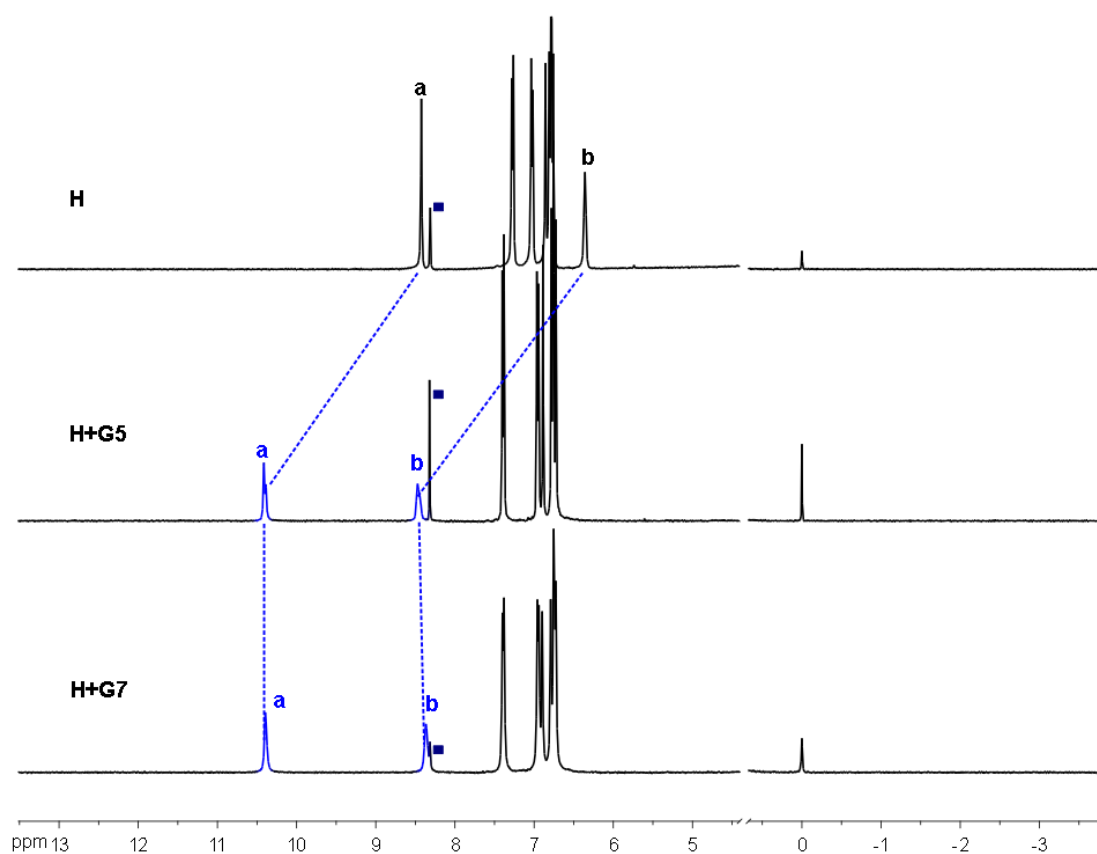

**Figure S21.** Partial  $^1\text{H}$  NMR spectra (400 MHz, 298K) of **H** (10 mM) and its mixture with **G5** (10 mM) and **G7** (10 mM) in  $\text{DMSO}-d_6$ . (**a** and **b**: signals of urea protons on **H**; the peaks marked with ■ are ascribed to chloroform).



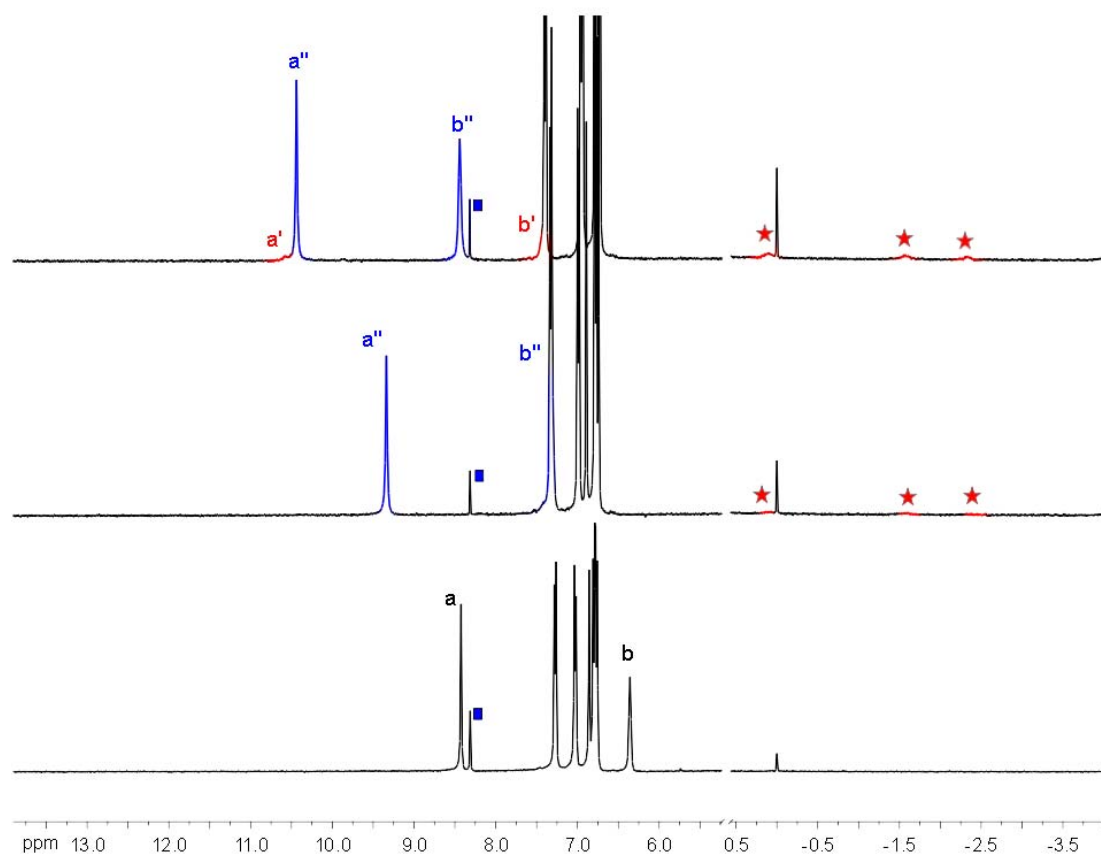

**Figure S22.** Partial  $^1\text{H}$  NMR spectra (400 MHz, 298K) of **H** (10 mM) in the presence of increasing amounts of **G9**; from bottom to top: 0.0, 0.8, and 1.5 equivalents. (**a'** and **b'**: signals of urea protons from interpenetrated **H**; **a''** and **b''**: signals of urea protons from non-interpenetrated **H**; ★: signals from methylene protons of encapsulated **G9**; the peaks marked with ■ are ascribed to chloroform).

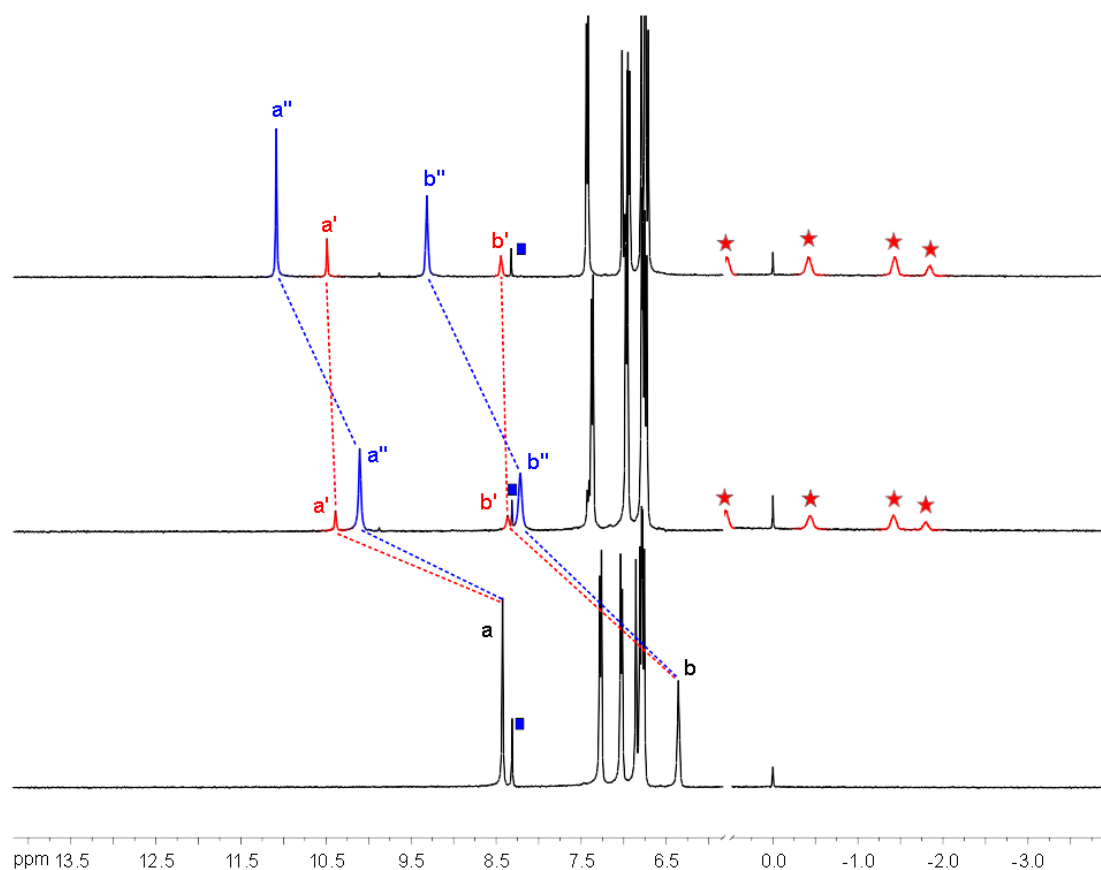

**Figure S23.** Partial  $^1\text{H}$  NMR spectra (400 MHz, 298K) of **H** (10 mM) in the presence of increasing amounts of **G11**; from bottom to top: 0.0, 0.8, and 1.5 equivalents. (**a'** and **b'**: signals of urea protons from interpenetrated **H**; **a''** and **b''**: signals of urea protons from non-interpenetrated **H**; ★: signals from methylene protons of encapsulated **G11**; the peaks marked with ■ are ascribed to chloroform).

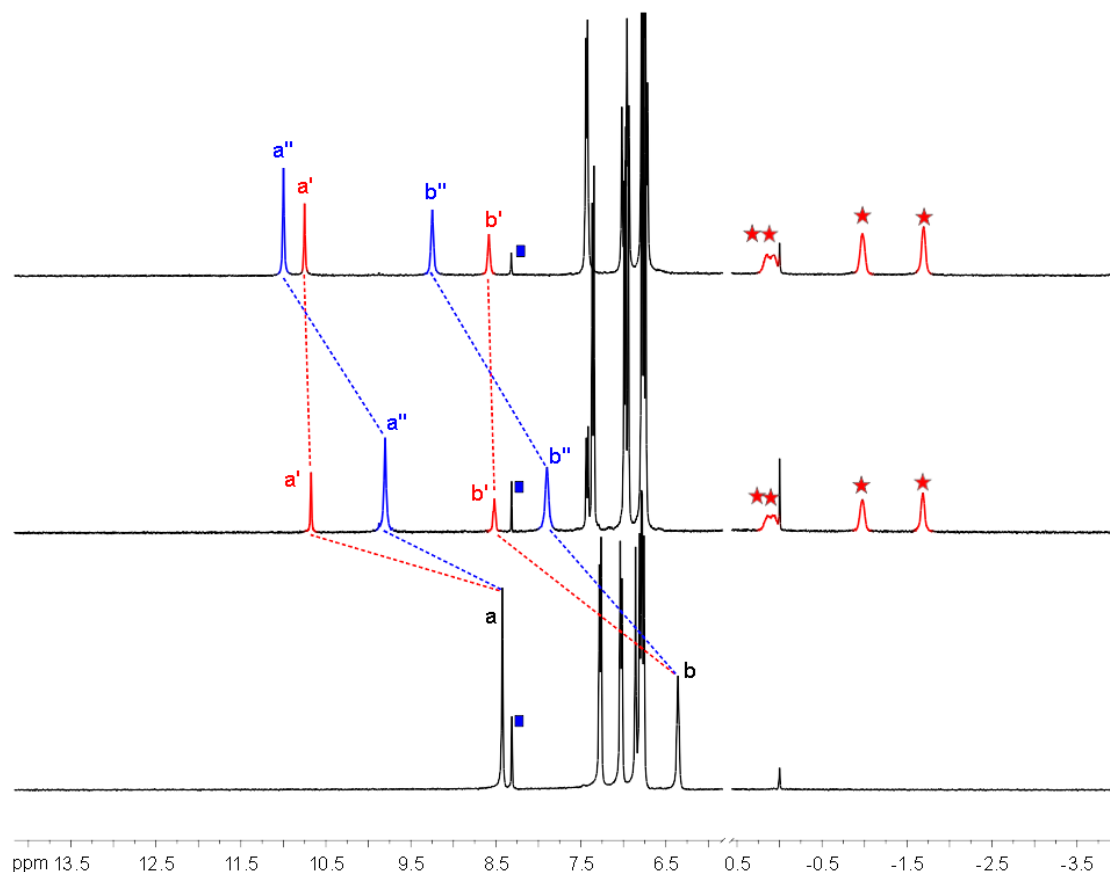

**Figure S24.** Partial  $^1\text{H}$  NMR spectra (400 MHz, 298K) of **H** (10 mM) in the presence of increasing amounts of **G12**; from bottom to top: 0.0, 0.8, and 1.5 equivalents. (**a'** and **b'**: signals of urea protons from interpenetrated **H**; **a''** and **b''**: signals of urea protons from non-interpenetrated **H**; ★: signals from methylene protons of encapsulated **G12**; the peaks marked with ■ are ascribed to chloroform).

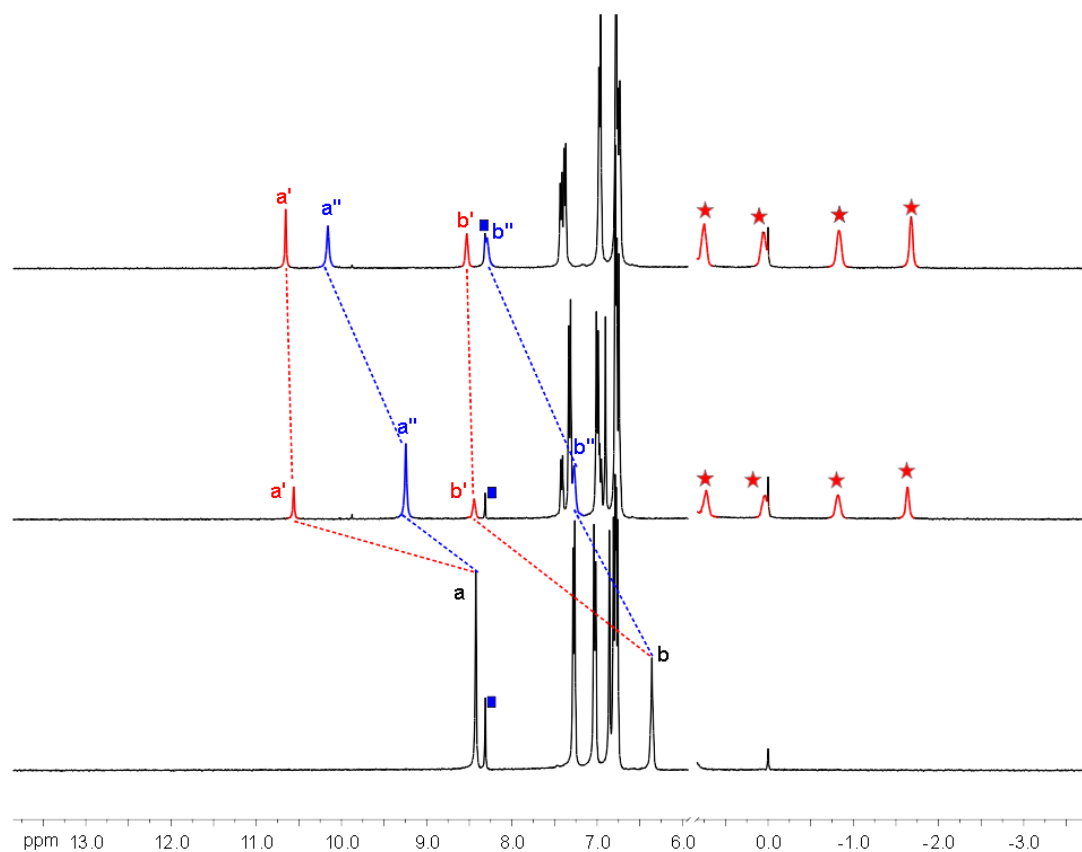

**Figure S25.** Partial  $^1\text{H}$  NMR spectra (400 MHz, 298K) of **H** (10 mM) in the presence of increasing amounts of **G14**; from bottom to top: 0.0, 0.8, and 1.5 equivalents. (**a'** and **b'**: signals of urea protons from interpenetrated **H**; **a''** and **b''**: signals of urea protons from non-interpenetrated **H**; ★: signals from methylene protons of encapsulated **G14**; the peaks marked with ■ are ascribed to chloroform).

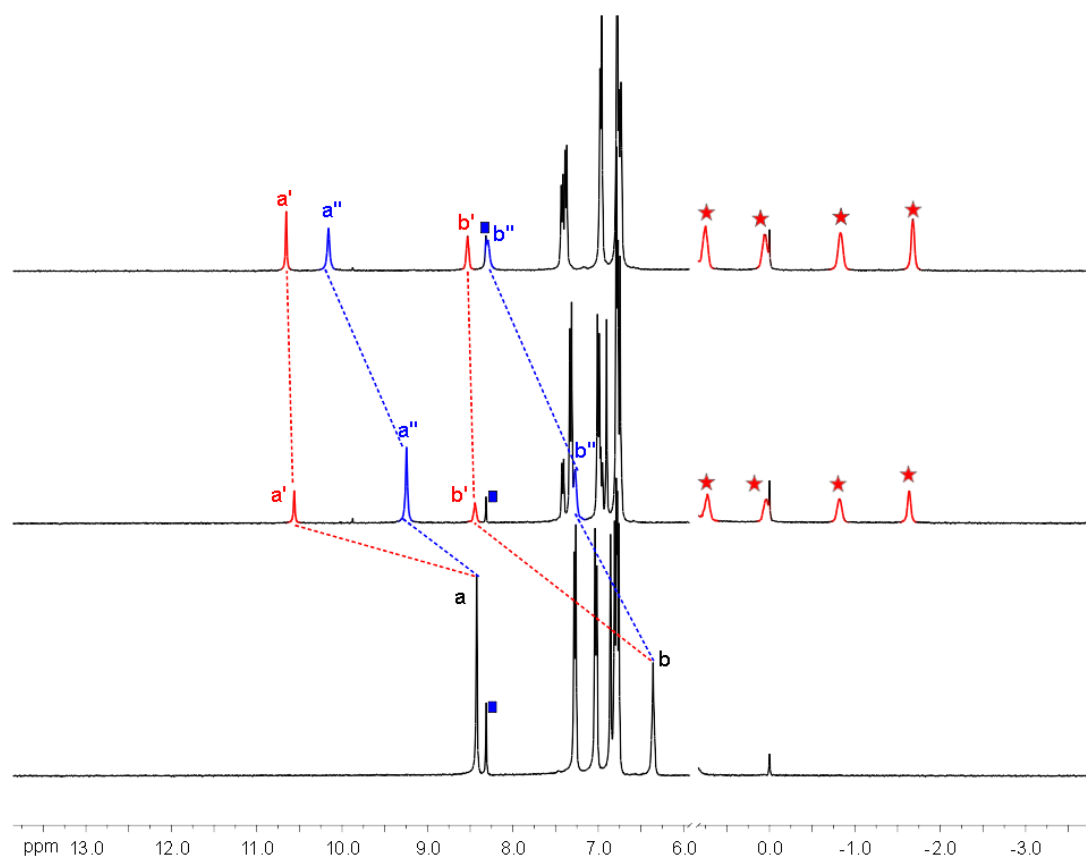

**Figure S26.** Partial  $^1\text{H}$  NMR spectra (400 MHz, 298K) of **H** (10 mM) in the presence of increasing amounts of **G15**; from bottom to top: 0.0, 0.8, and 1.5 equivalents. (**a'** and **b'**: signals of urea protons from interpenetrated **H**; **a''** and **b''**: signals of urea protons from non-interpenetrated **H**; ★: signals from methylene protons of encapsulated **G15**; the peaks marked with ■ are ascribed to chloroform).

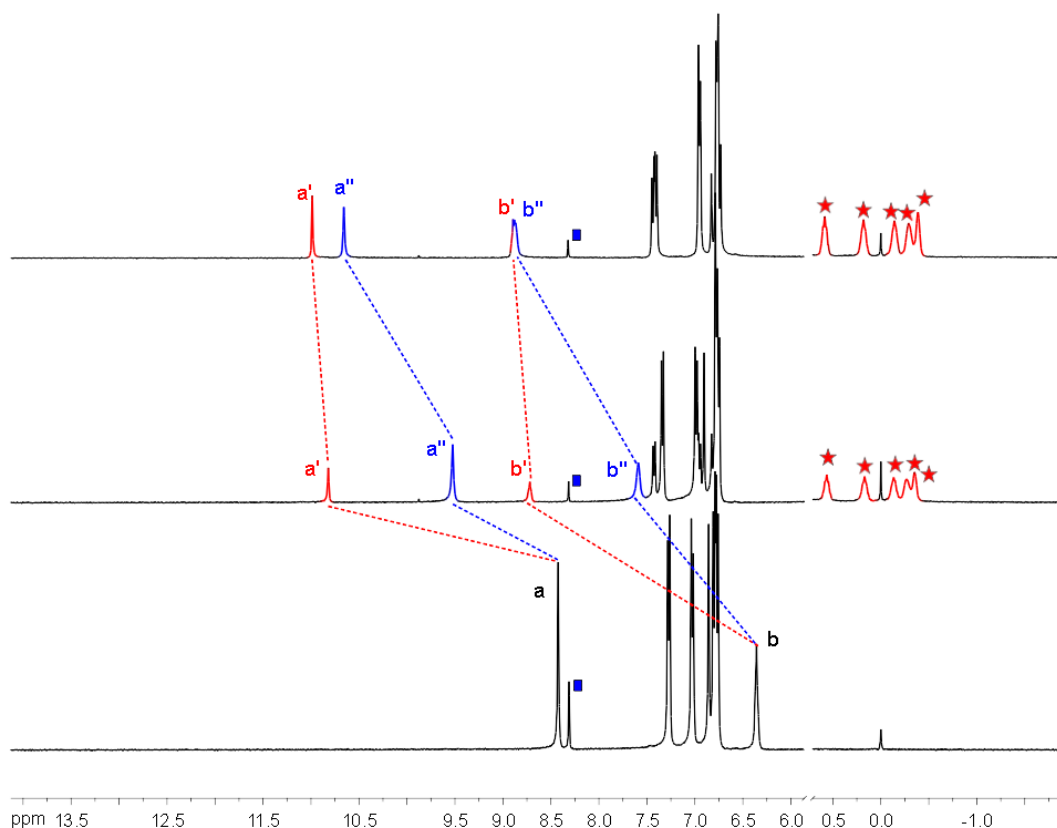

**Figure S27.** Partial  $^1\text{H}$  NMR spectra (400 MHz, 298K) of **H** (10 mM) in the presence of increasing amounts of **G20**; from bottom to top: 0.0, 0.8, and 1.5 equivalents. (**a'** and **b'**: signals of urea protons from interpenetrated **H**; **a''** and **b''**: signals of urea protons from non-interpenetrated **H**; ★: signals from methylene protons of encapsulated **G20**; the peaks marked with ■ are ascribed to chloroform)

8. **Table S1.** The result of ESI-MS analysis on **Gn**⊂**H**.

| Bis-TBA salts of dicarboxylates [ <b>Gn</b> ] | Formula of <b>Gn</b> ⊂ <b>H</b>                       | Found <sup>a</sup>                          | Calculated mass for <b>Gn</b> ⊂ <b>H</b>    |
|-----------------------------------------------|-------------------------------------------------------|---------------------------------------------|---------------------------------------------|
| Azelate<br>( <b>G9</b> )                      | $\text{C}_{104}\text{H}_{156}\text{N}_6\text{O}_{16}$ | 1502.90 <sup>b</sup><br>630.60 <sup>c</sup> | 1502.88 <sup>b</sup><br>630.30 <sup>c</sup> |
| Undecanedioate<br>( <b>G11</b> )              | $\text{C}_{106}\text{H}_{160}\text{N}_6\text{O}_{16}$ | 1530.90 <sup>b</sup><br>644.45 <sup>c</sup> | 1530.91 <sup>b</sup><br>644.31 <sup>c</sup> |
| Dodecanedioate<br>( <b>G12</b> )              | $\text{C}_{107}\text{H}_{162}\text{N}_6\text{O}_{16}$ | 1545.00 <sup>b</sup><br>651.60 <sup>c</sup> | 1544.93 <sup>b</sup><br>651.32 <sup>c</sup> |
| Tridecanedioate<br>( <b>G13</b> )             | $\text{C}_{108}\text{H}_{164}\text{N}_6\text{O}_{16}$ | 1559.90 <sup>b</sup><br>658.65 <sup>c</sup> | 1559.94 <sup>b</sup><br>658.83 <sup>c</sup> |
| Tetradecanedioate<br>( <b>G14</b> )           | $\text{C}_{109}\text{H}_{166}\text{N}_6\text{O}_{16}$ | 1573.00 <sup>b</sup><br>665.70 <sup>c</sup> | 1572.96 <sup>b</sup><br>665.34 <sup>c</sup> |
| Pentadecanedioate<br>( <b>G15</b> )           | $\text{C}_{110}\text{H}_{168}\text{N}_6\text{O}_{16}$ | 1587.75 <sup>b</sup><br>672.60 <sup>c</sup> | 1586.97 <sup>b</sup><br>672.34 <sup>c</sup> |
| Eicosanedioate<br>( <b>G20</b> )              | $\text{C}_{115}\text{H}_{178}\text{N}_6\text{O}_{16}$ | 1657.85 <sup>b</sup><br>707.60 <sup>c</sup> | 1657.05 <sup>b</sup><br>707.38 <sup>c</sup> |

<sup>a</sup>: negative mode; <sup>b</sup>: [**Gn**⊂**H**-TBA]<sup>-</sup>; <sup>c</sup>: [**Gn**⊂**H**-2TBA]<sup>2-</sup>

9. Electrospray ionization mass spectra of **H** with **Gn** in DMSO-*d*<sub>6</sub>

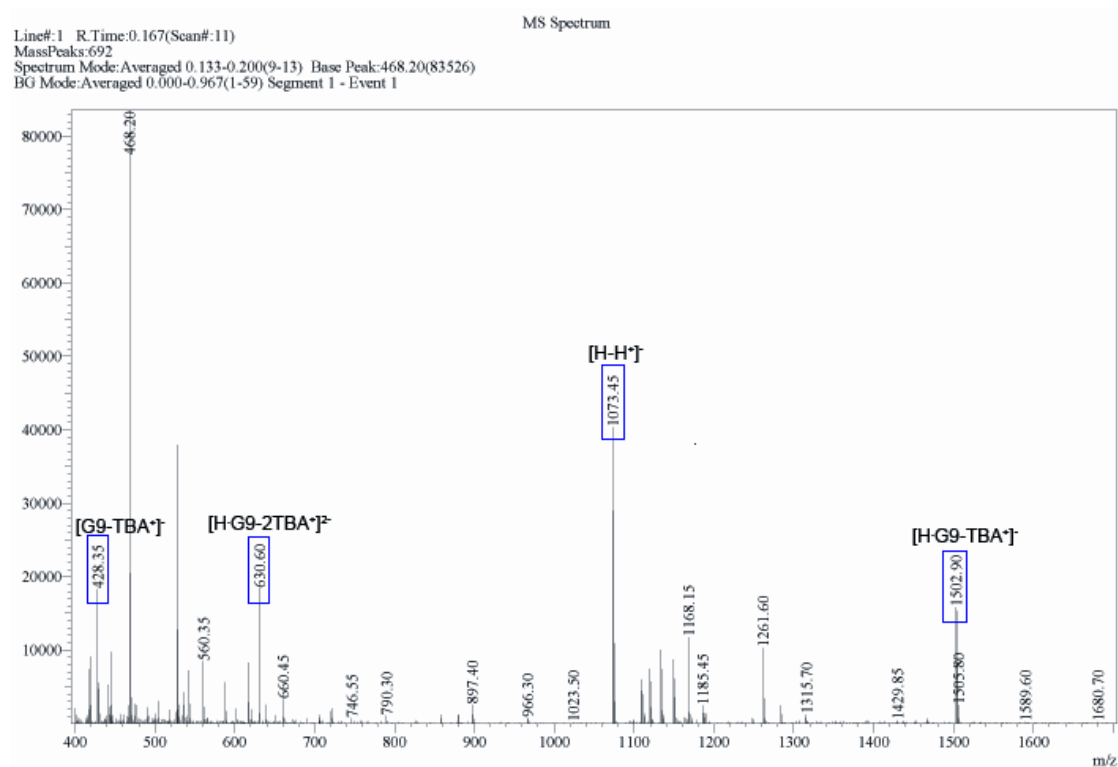

Figure S28. ESI MS of an equimolar DMSO solution of **H** and **G9**.

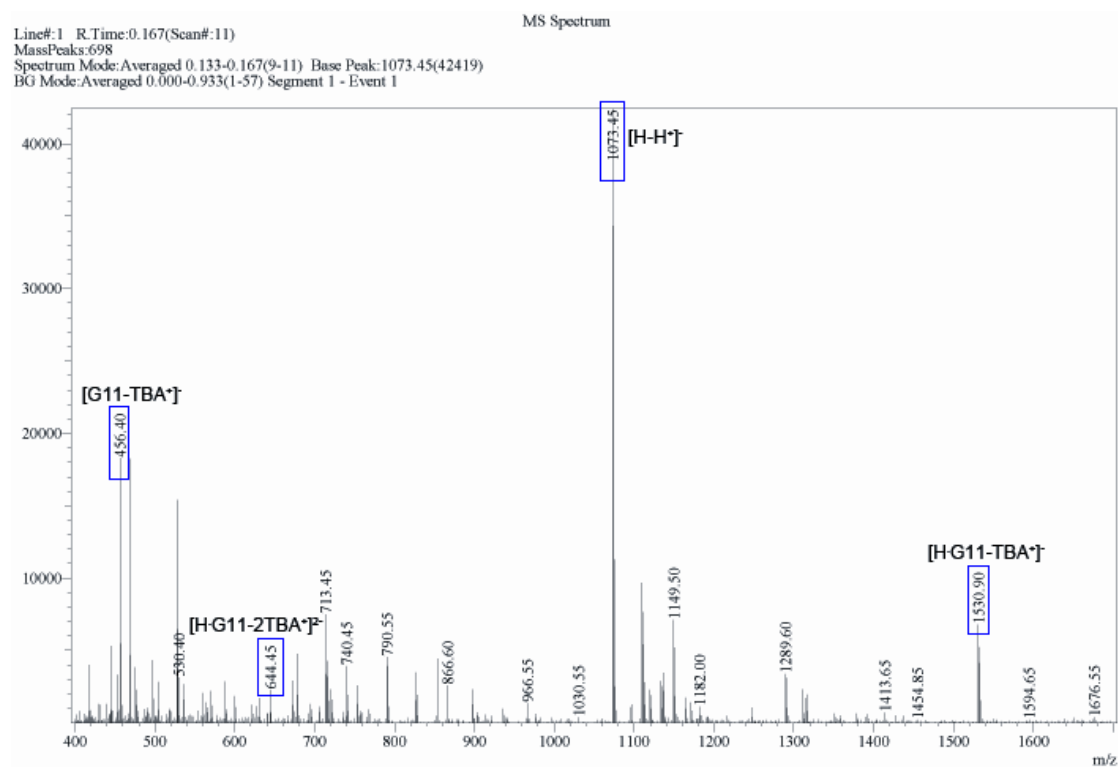

Figure S29. ESI MS of an equimolar DMSO solution of **H** and **G11**.

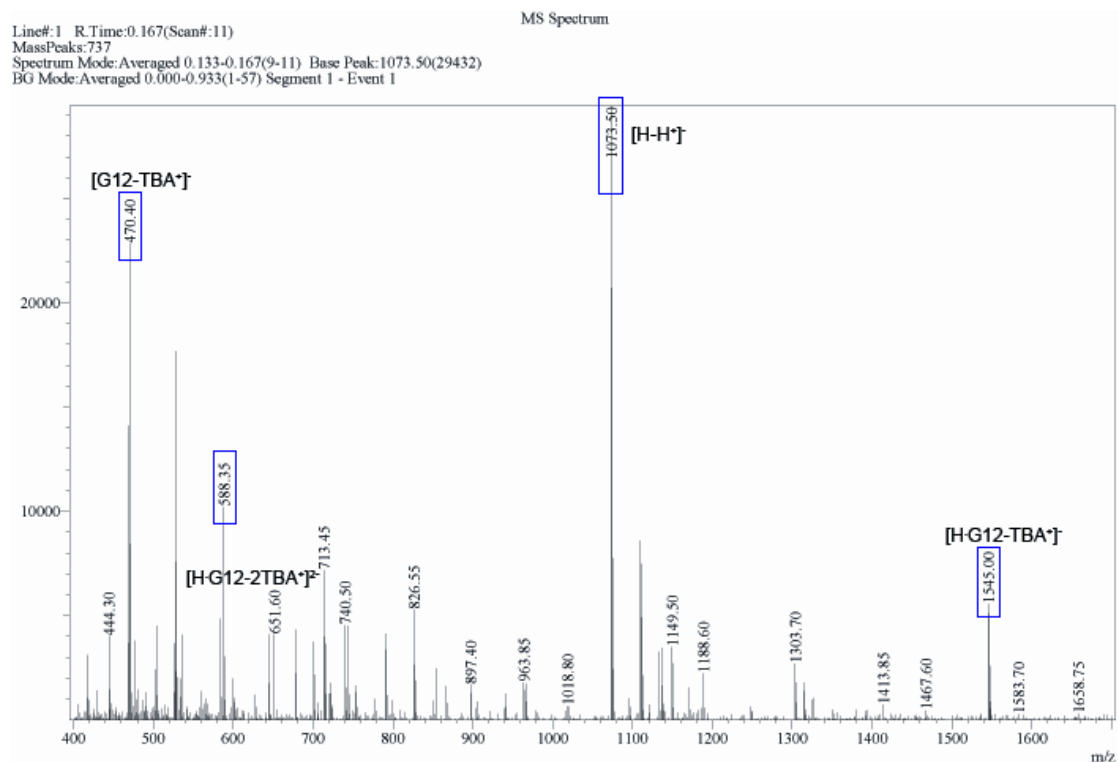

**Figure S30.** ESI MS of an equimolar DMSO solution of **H** and **G12**.

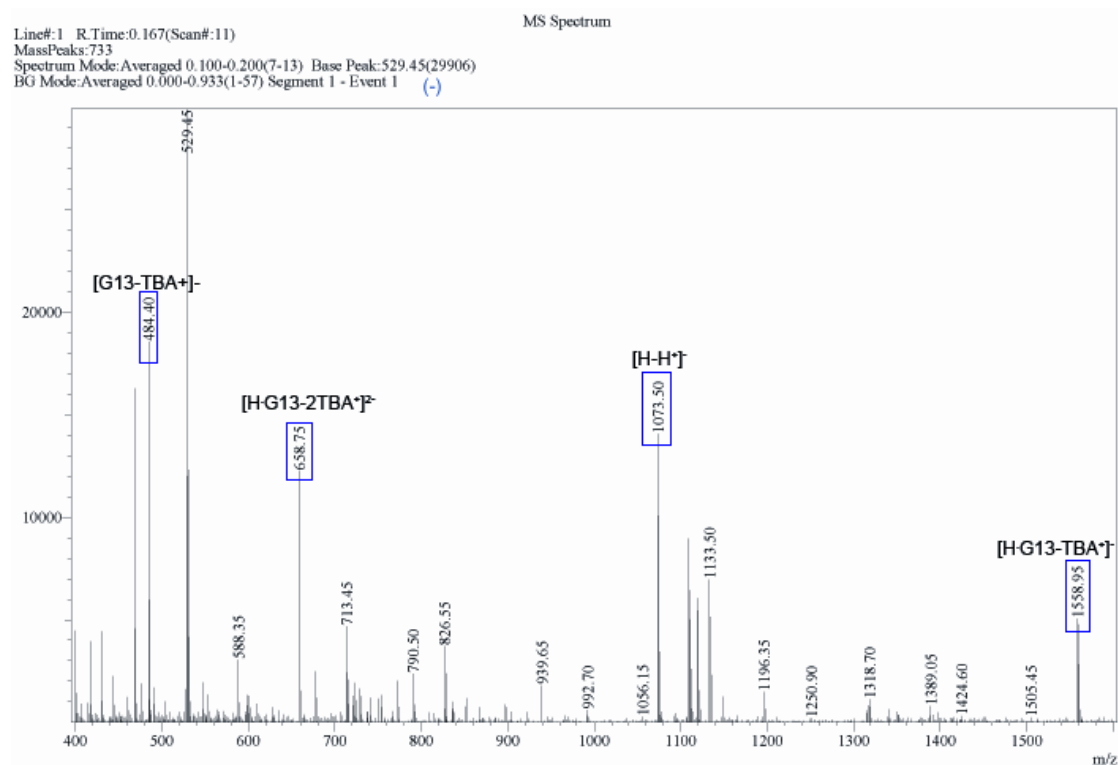

**Figure S31.** ESI MS of an equimolar DMSO solution of **H** and **G13**.



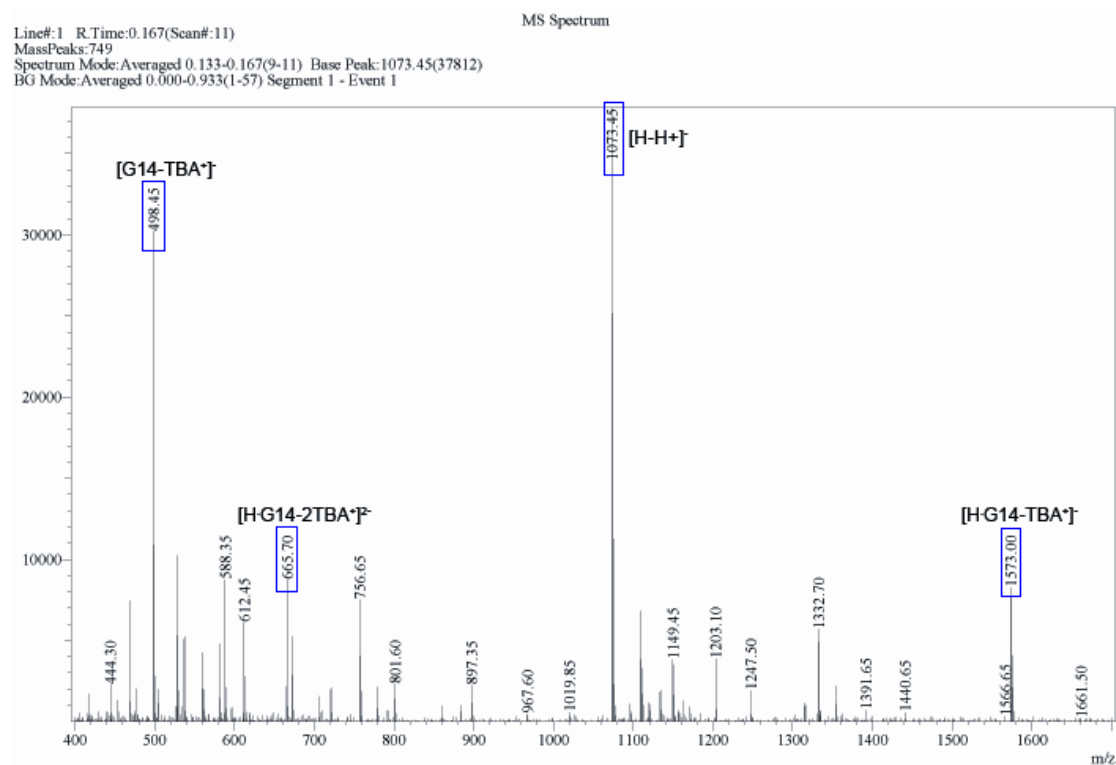

**Figure S32.** ESI MS of an equimolar DMSO solution of **H** and **G14**.

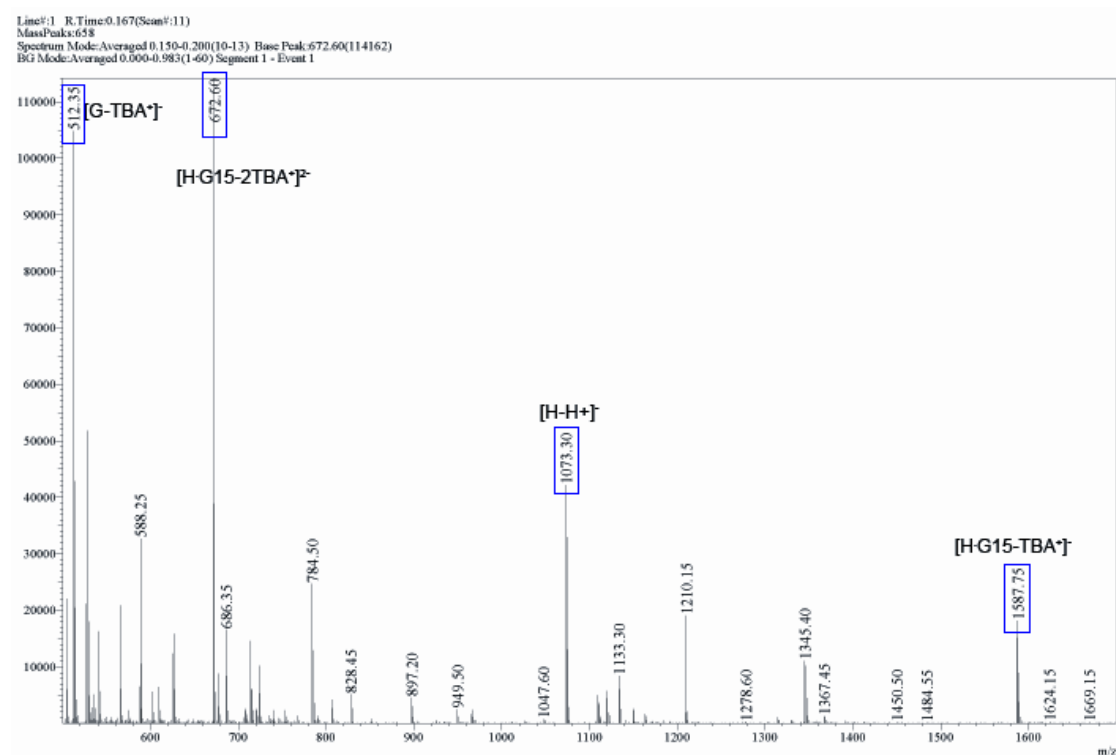

**Figure S33.** ESI MS of an equimolar DMSO solution of **H** and **G15**.

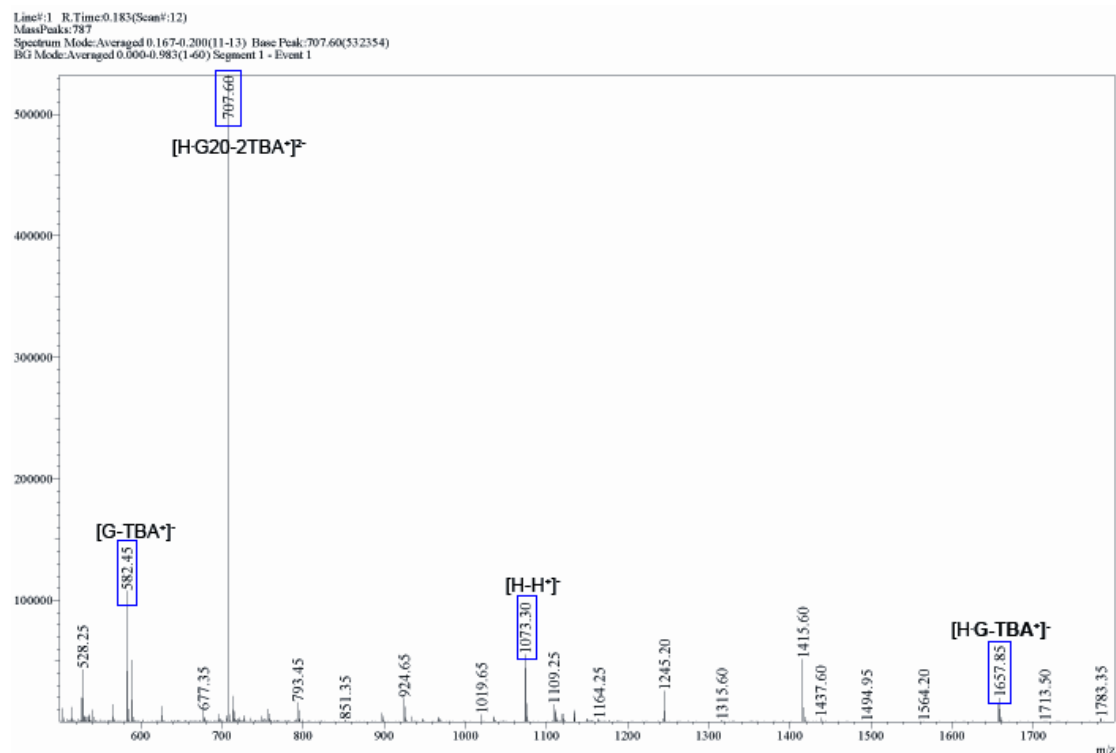

**Figure S34.** ESI MS of an equimolar DMSO solution of **H** and **G20**.

#### 10. Determination of the association constants.

For **Gn**⊂**H** host-guest complexes, chemical exchange is slow on the NMR time scale and peaks are observed for both pseudorotaxane-type inclusion complexes and external complexes in the NMR spectra. So association constants for pseudorotaxane-type inclusion complexes could be determined by the single-point method<sup>S3</sup> utilizing the following equation and using equal initial concentrations of **H** and **Gn** (10 mM) and the integral values of the urea *NH* resonances (<sup>1</sup>H NMR spectra) for interpenetrated and non-interpenetrated **H**. (Table 1)

$$K_a = \frac{[\text{pseudorotaxane}]}{[\text{H}]^2_{\text{non-interpenetrated}}}$$

*References:*

- S1. X. Hu, P. Zhang, X. Wu, W. Xia, T. Xiao, J. Jiang, C. Lin and L. Wang, *Polymer Chem.*, 2012, DOI: 10.1039/c2py20285a.
- S2. B. R. Linton, M. S. Goodman, E. Fan, S. A. van Arman, A. D. Hamilton, *J. Org. Chem.*, 2001, **66**, 7313-7319.
- S3. Association constants determined using the  $^1\text{H}$  NMR single point methods. See: (a) J. C. Adrian, Jr. and C. S. Wilcox, *J. Am. Chem. Soc.*, 1991, **113**, 678; (b) S. J. Cantrill, G. J. Youn, J. F. Stoddart and D. J. Williams, *J. Org. Chem.*, 2001, **66**, 6857; (c) A. B. Braunschweig, C. M. Ronconi, J.-Y. Han, F. Arico, S. J. Cantrill, J. F. Stoddart, S. I. Khan, A. J. P. White, D. J. Williams, *Eur. J. Org. Chem.*, 2006, 1857; (d) S. J. Loeb and J. A. Wisner, *Angew. Chem., Int. Ed.*, 1998, **37**, 2838–2840; (e) L. Li and G. J. Clarkson, *Org. Lett.*, 2007, **9**, 497. (f) C. Li, Q. Xu, J. Li, F. Yao and X. Jia, *Org. Biomol. Chem.*, 2010, **8**, 1568; (g) X. Shu, S. Chen, J. Li, Z. Chen, L. Weng, X. Jia and C. Li, *Chem. Commun.*, 2012, **48**, 2967
